# Supplementary material for: Differential susceptibility of male and female germ cells to glucocorticoid-mediated signaling
Source: eLife journal article supplement (doi:10.7554/elife.90164), 2023-10-11

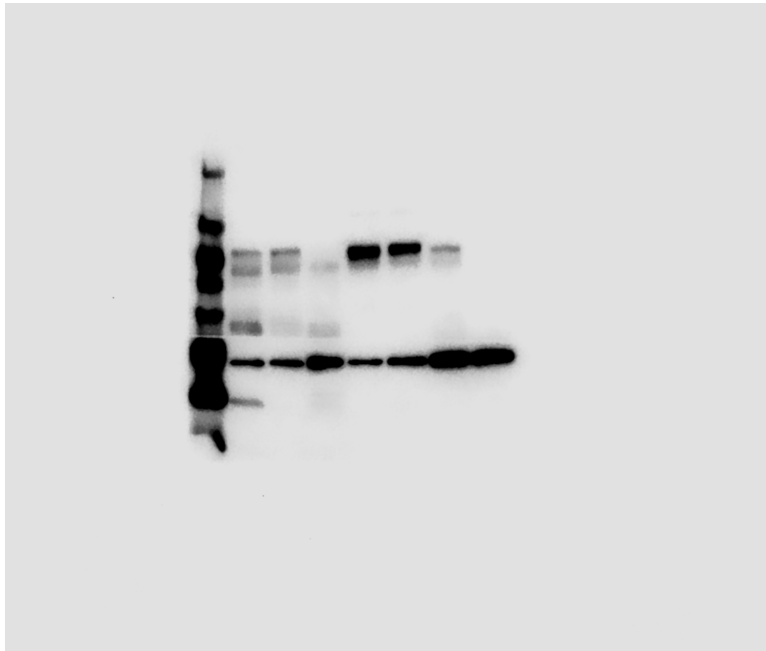

Supplement: fig2-data1 [file elife-90164-fig2-data1-v1.pdf]
